# Supplementary material for: How Are the Flower Structure and Nectar Composition of the Generalistic Orchid Neottia ovata Adapted to a Wide Range of Pollinators?
Source: MDPI journal article supplement (doi:10.3390/ijms22042214), 2021-02-23
Supplement: s1 [file s1]

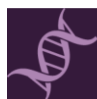

**Table S1.** Amino acids transformation using Tukey's Ladder of Power:

$$y = \begin{cases} x^\lambda, & \text{if } \lambda > 0 \\ \log(x), & \text{if } \lambda = 0 \\ -(x^\lambda), & \text{if } \lambda < 0 \end{cases}, \text{ where } y - \text{new value, } x - \text{original value.}$$

| Amino acid | Number of iterations | $\lambda$ | W statistic | p-value   |
|------------|----------------------|-----------|-------------|-----------|
| Asp        | 2078                 | 0.385     | 0.9857      | 0.2798    |
| Glu        | 2042                 | 0.205     | 0.9822      | 0.1411    |
| Asn        | 2048                 | 0.235     | 0.9867      | 0.3380    |
| Ser        | 2038                 | 0.185     | 0.9811      | 0.1139    |
| Gln        | 2055                 | 0.270     | 0.9795      | 0.08244   |
| His        | 2063                 | 0.310     | 0.9863      | 0.3146    |
| Gly        | 2065                 | 0.320     | 0.9686      | 0.009655  |
| Thr        | 2079                 | 0.390     | 0.9756      | 0.03763   |
| Cit        | 2083                 | 0.410     | 0.8806      | 5.183e-08 |
| Arg        | 2090                 | 0.445     | 0.9517      | 0.0004818 |
| Ala        | 1989                 | -0.060    | 0.9839      | 0.1981    |
| Tau        | 2111                 | 0.550     | 0.9699      | 0.01231   |
| GABA       | 2081                 | 0.400     | 0.9497      | 0.0003495 |
| BABA       | 2103                 | 0.510     | 0.8189      | 2.054e-10 |
| Tyr        | 2074                 | 0.365     | 0.8103      | 1.053e-10 |
| AABA       | 2103                 | 0.510     | 0.8793      | 4.537e-08 |
| Cys        | 2020                 | 0.095     | 0.9920      | 0.7597    |
| Val        | 2075                 | 0.370     | 0.9718      | 0.01793   |
| Met        | 2167                 | 0.830     | 0.9497      | 0.0003468 |
| Nva        | 2075                 | 0.370     | 0.7778      | 9.977e-12 |
| Trp        | 2092                 | 0.455     | 0.9845      | 0.2221    |
| Phe        | 2078                 | 0.385     | 0.9725      | 0.02038   |
| Ile        | 2070                 | 0.345     | 0.9882      | 0.4378    |
| Orn        | 2078                 | 0.385     | 0.9294      | 1.682e-05 |
| Leu        | 2062                 | 0.305     | 0.9868      | 0.3403    |
| Lys        | 2059                 | 0.290     | 0.9722      | 0.01927   |
| Pro        | 2061                 | 0.300     | 0.9819      | 0.134     |

**Table S2.** Kaiser-Meyer-Olkin test results sorted in descending order by the measure of sampling adequacy (MSA) (overall MSA = 0.92).

| Amino acid | MSA  | Variable type |
|------------|------|---------------|
| Asp        | 0.95 | Active        |
| Glu        | 0.95 | Active        |
| Asn        | 0.95 | Active        |
| Ser        | 0.95 | Active        |
| Cys        | 0.95 | Active        |
| Trp        | 0.95 | Active        |
| Ile        | 0.95 | Active        |
| Orn        | 0.95 | Active        |
| Leu        | 0.95 | Active        |
| Lys        | 0.95 | Active        |
| Ala        | 0.94 | Active        |
| Phe        | 0.94 | Active        |
| Gly        | 0.93 | Active        |
| Cit        | 0.93 | Active        |
| Tyr        | 0.93 | Active        |
| Pro        | 0.93 | Active        |
| His        | 0.90 | Active        |
| Gln        | 0.88 | Active        |
| Thr        | 0.88 | Active        |
| GABA       | 0.88 | Active        |
| Nva        | 0.86 | Supplementary |
| Arg        | 0.85 | Active        |
| Met        | 0.74 | Supplementary |
| BABA       | 0.69 | Supplementary |
| Val        | 0.62 | Supplementary |
| AABA       | 0.54 | Supplementary |
| Tau        | 0.53 | Supplementary |

**Table S3.** Amino acids dataset used in PCA and UMAP analyses.

*Dataset is in Table3S.xlsx file.*

**Figure S1.** Boxplots of amino acids concentration for *Neottia ovata* populations. Colored dots are individual samples. The crossed square shows the mean. The lower and upper hinges correspond to the lower ( $Q_1$ ) and upper ( $Q_3$ ) quartiles. Thus box length shows the interquartile range (IQR). The thicker line inside boxes corresponds to the median. The lower whisker extends from the hinge to the smallest value at most  $Q_1 - 1.5 \times \text{IQR}$  of the hinge. The upper whisker extends from the hinge to the largest value no further than  $Q_3 + 1.5 \times \text{IQR}$ . Data beyond the end of the whiskers, indicated with an asterisk symbol, are outliers.

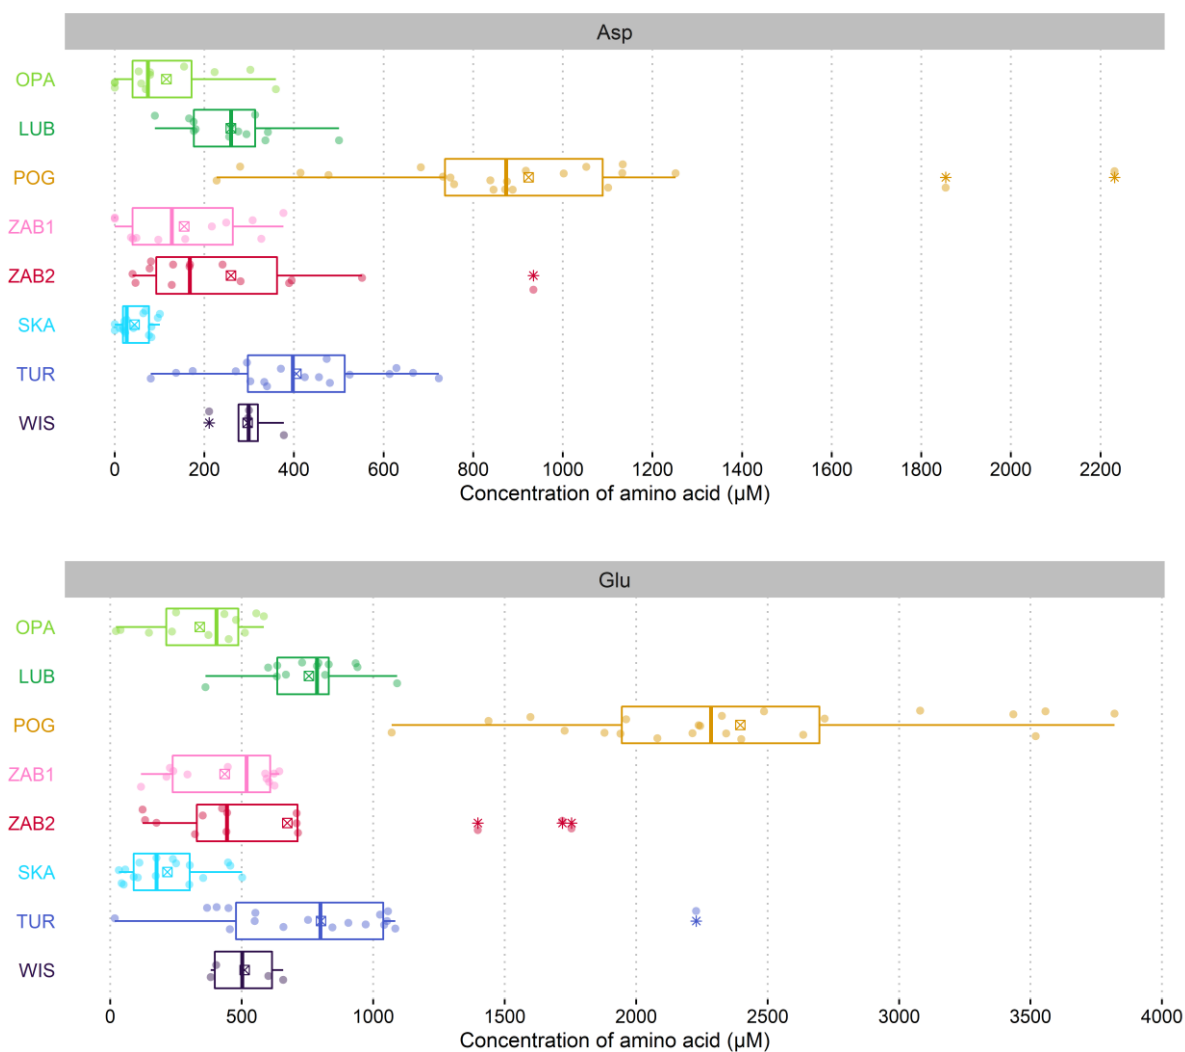

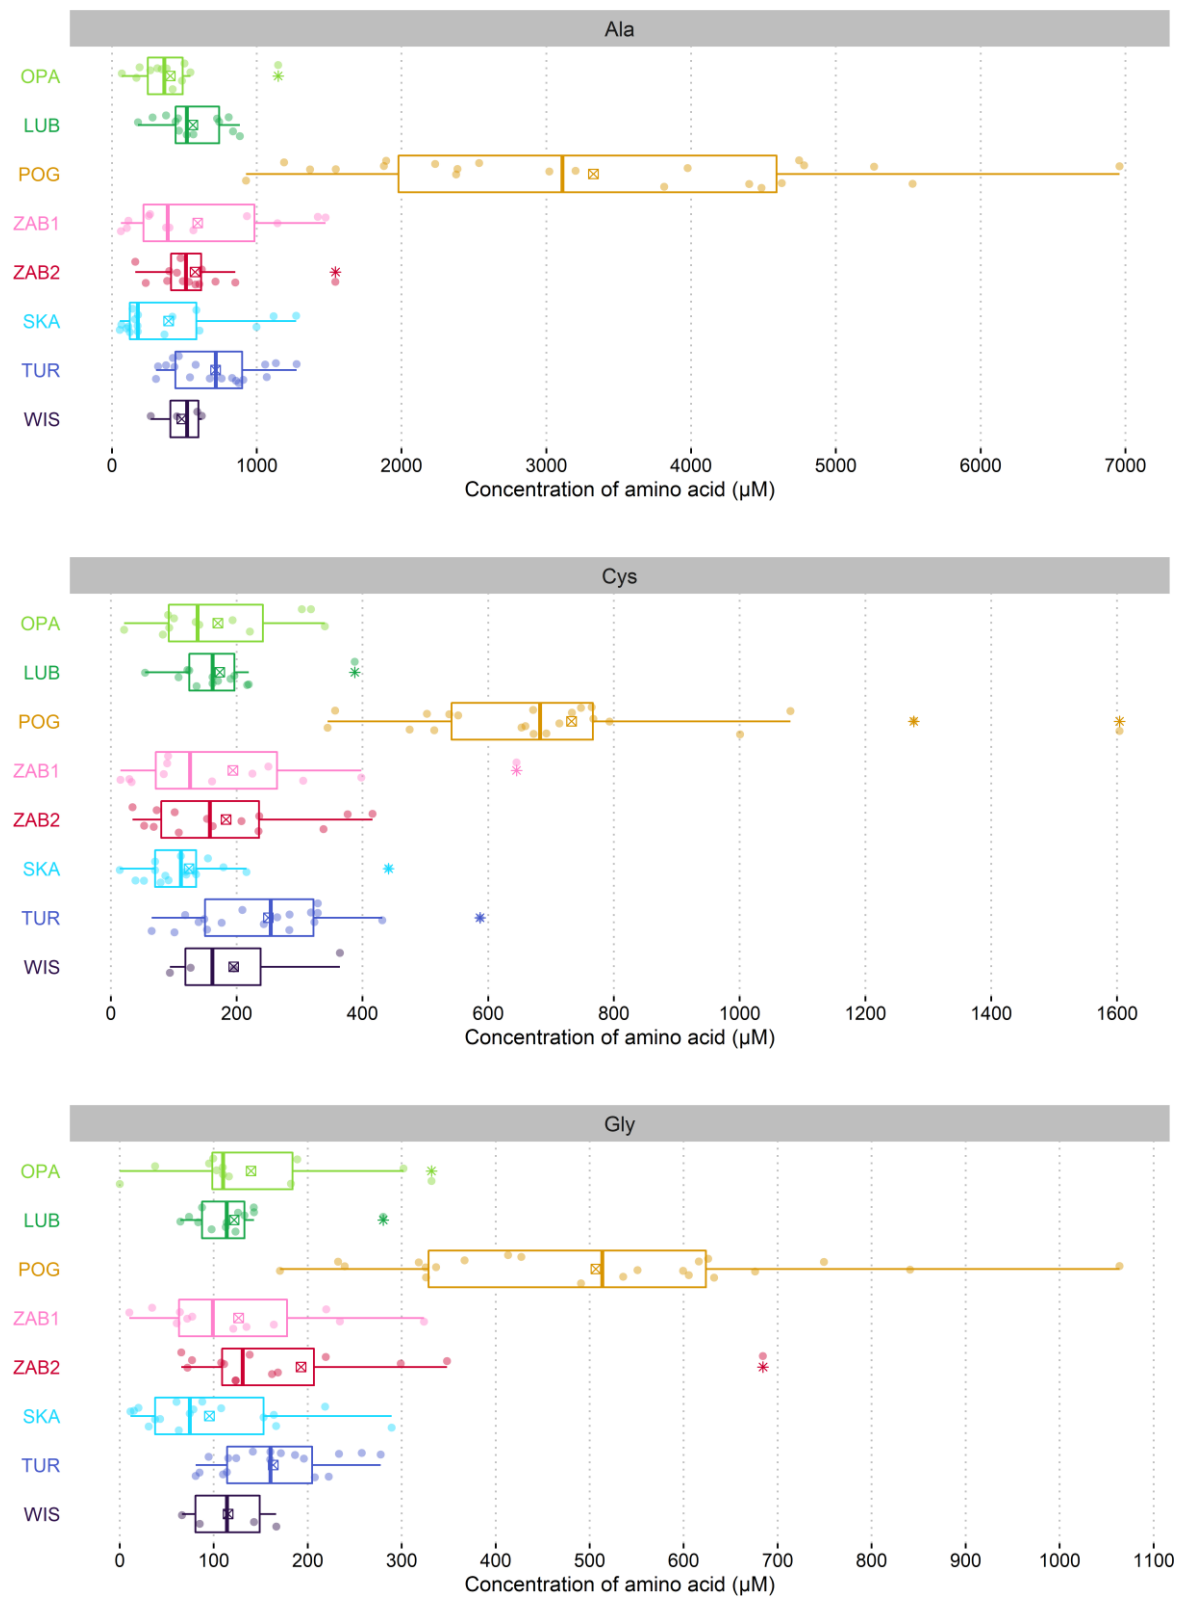

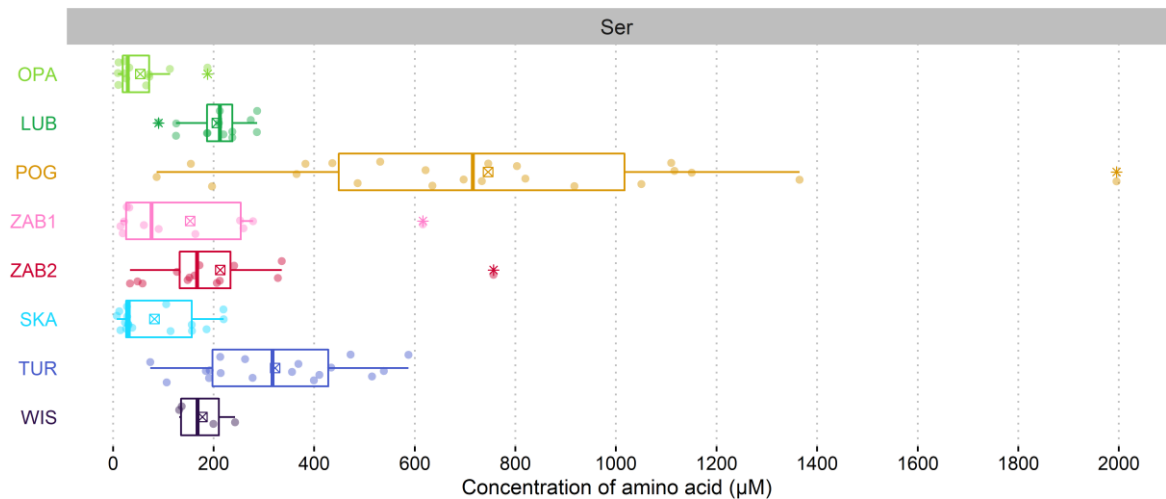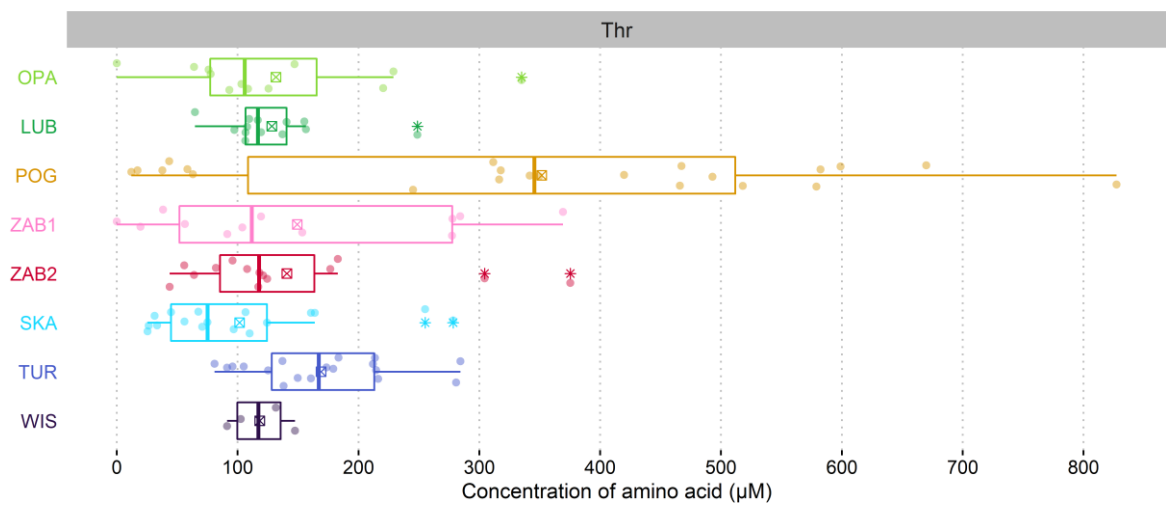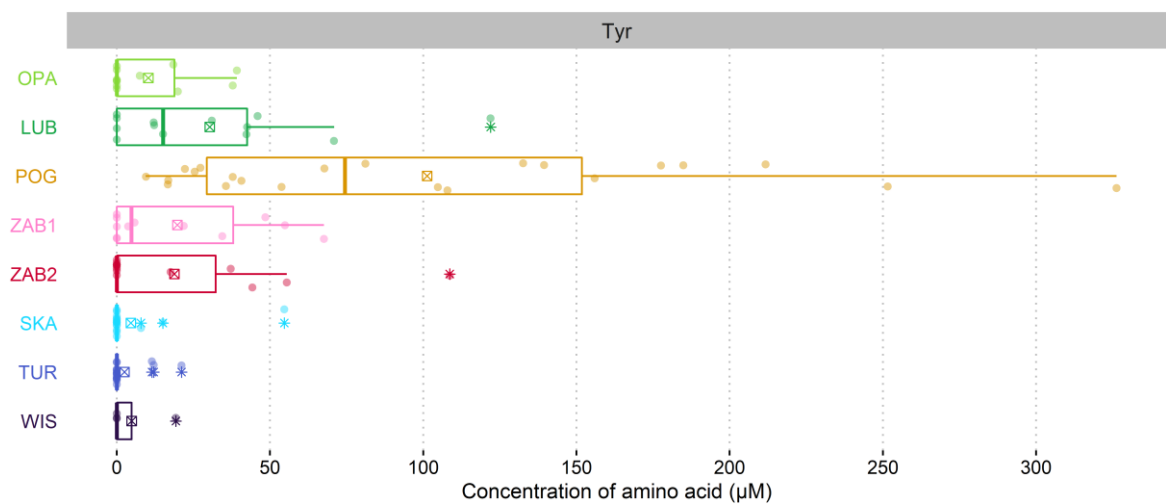

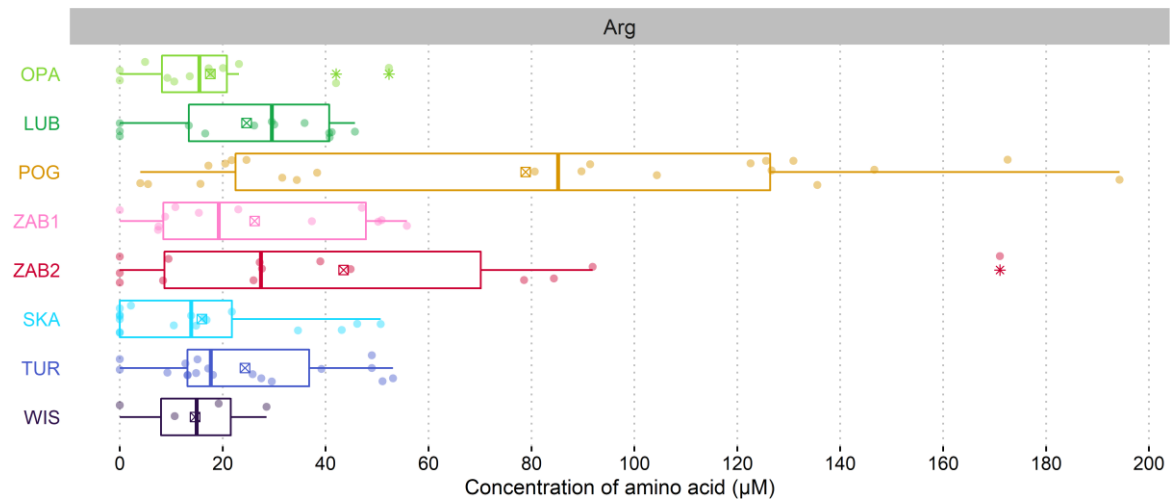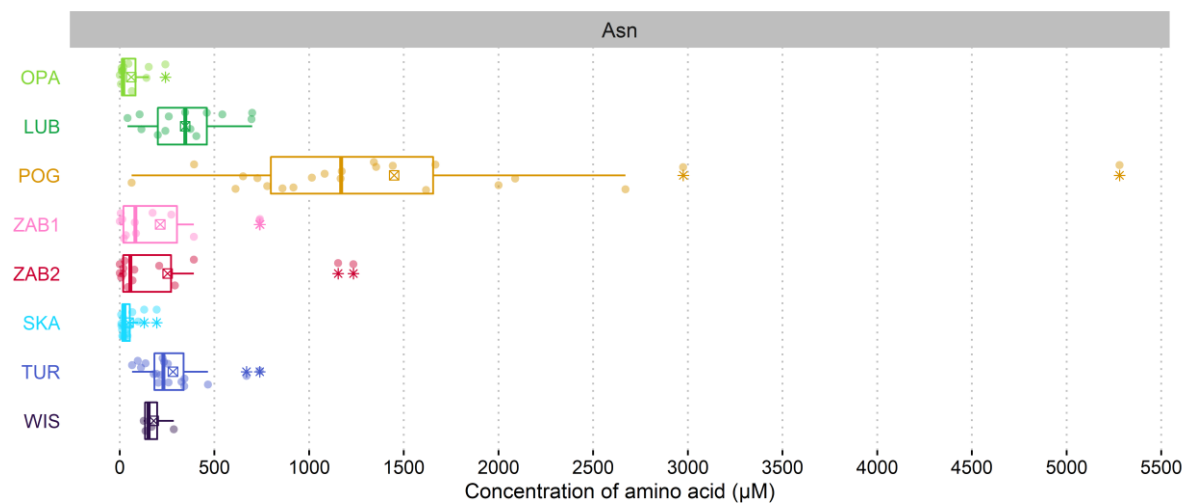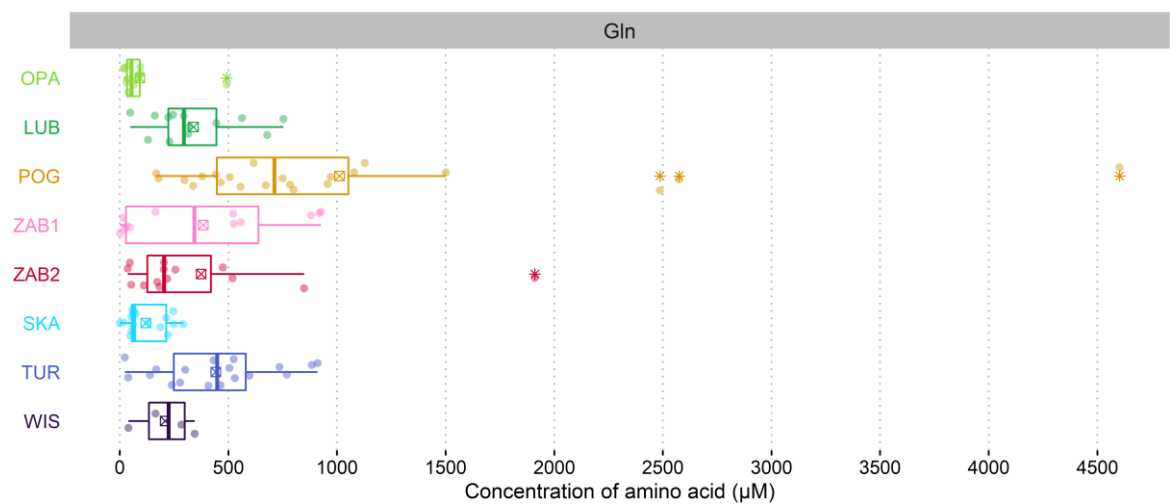

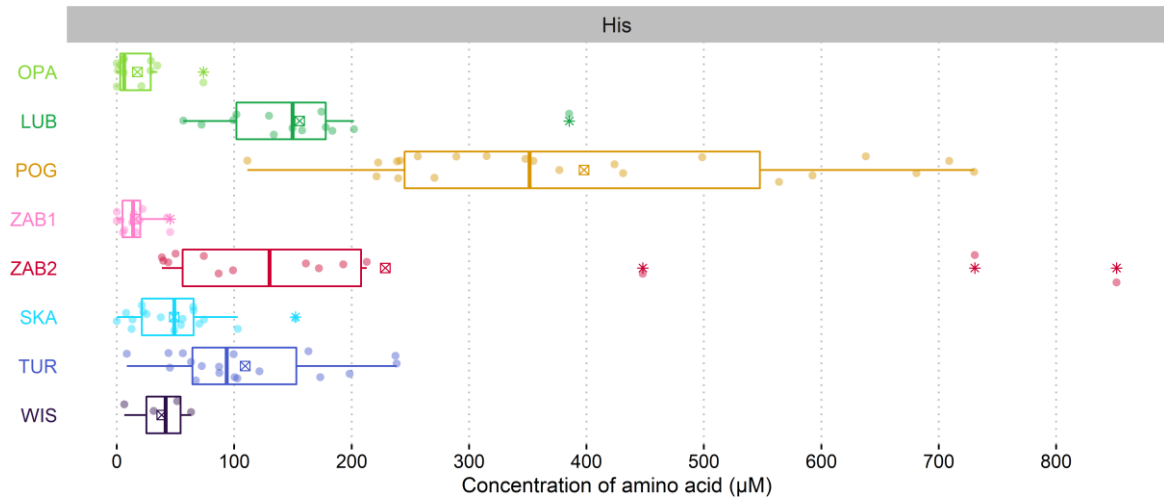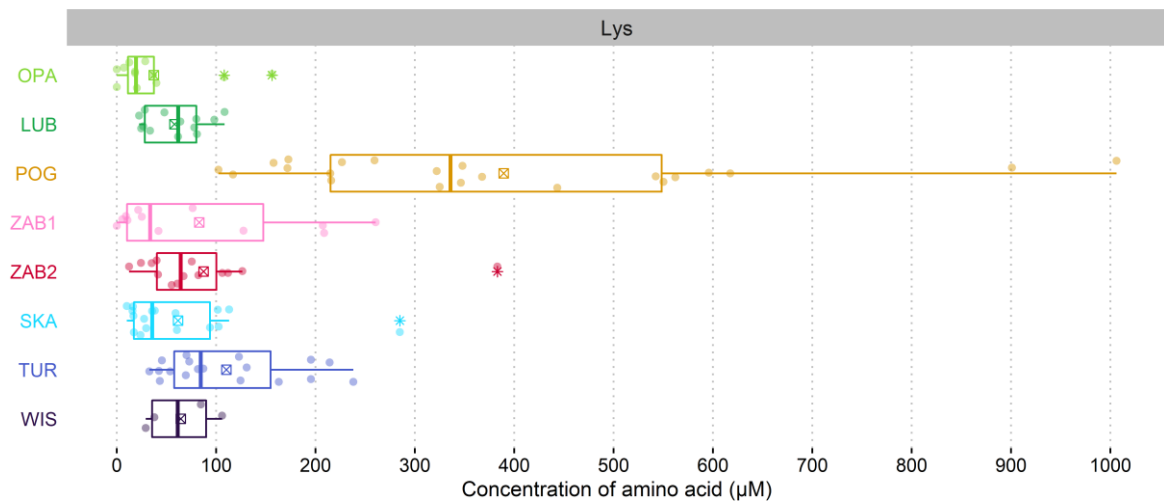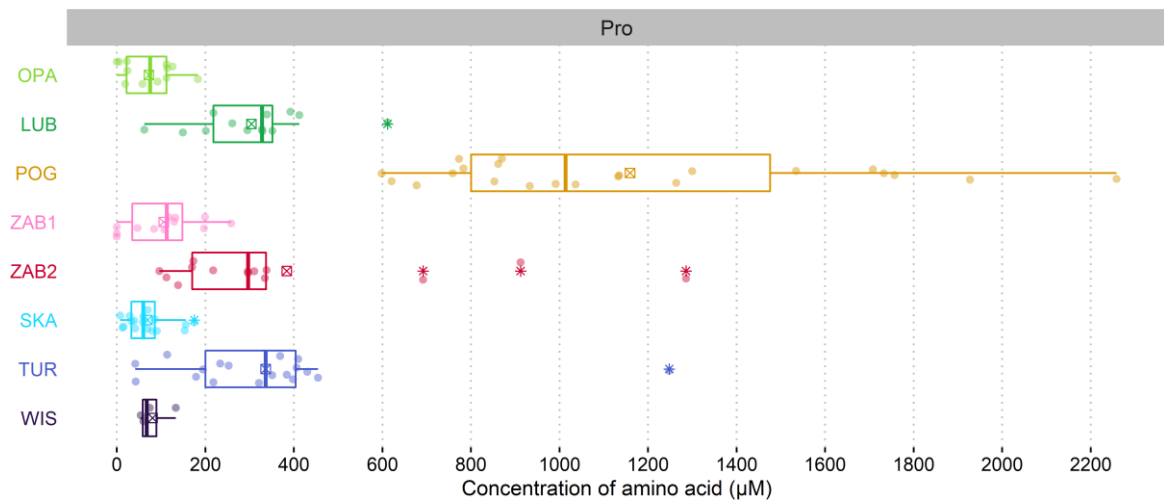



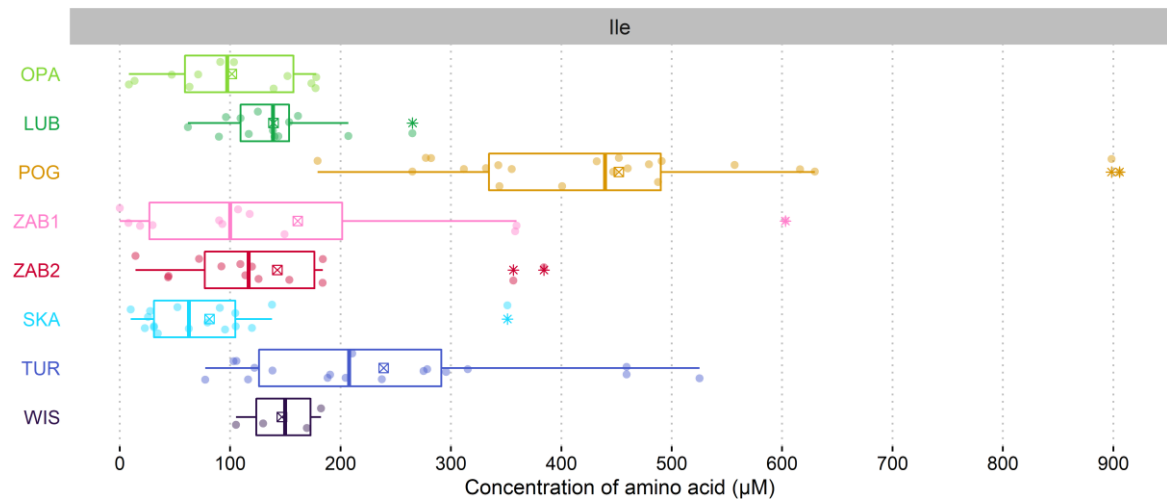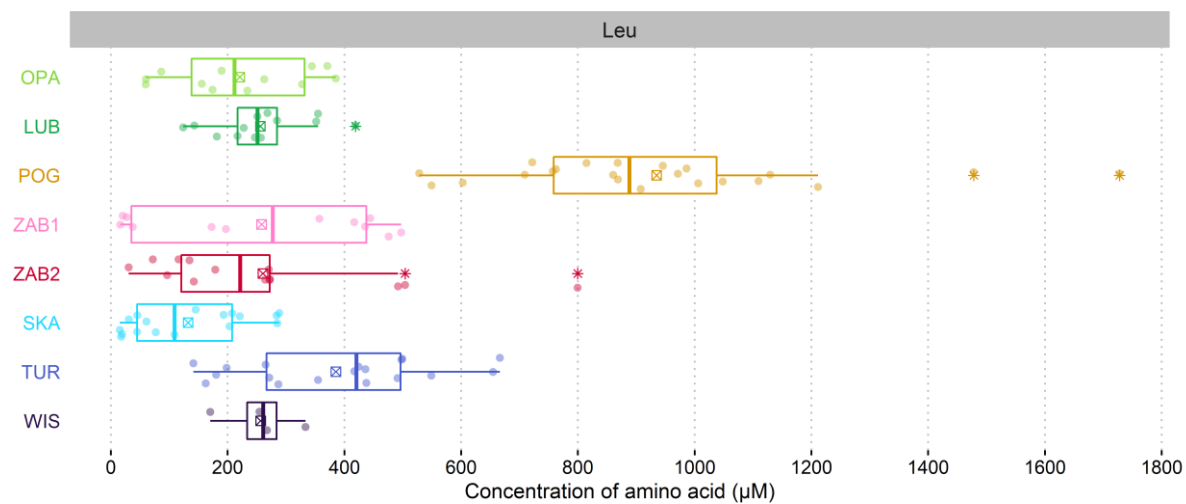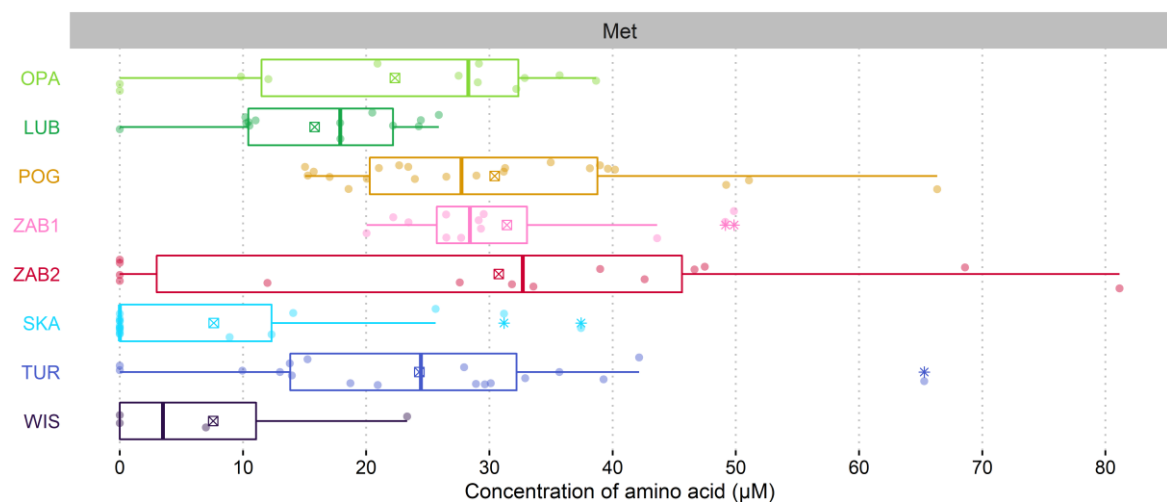

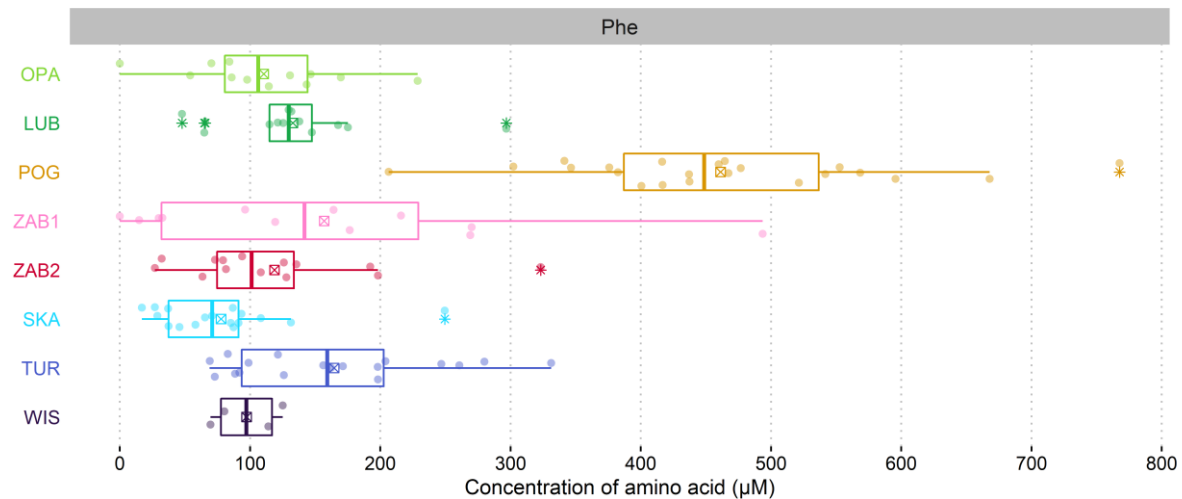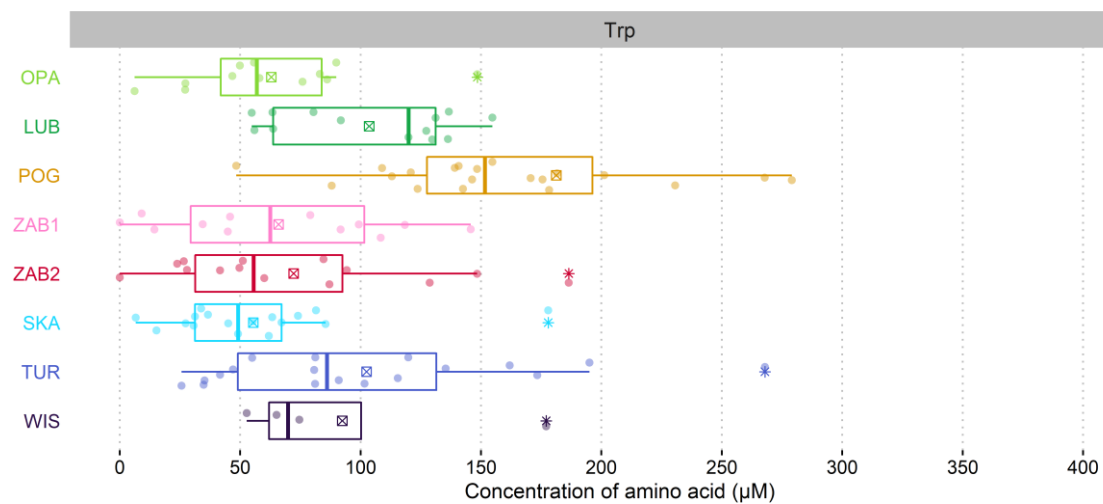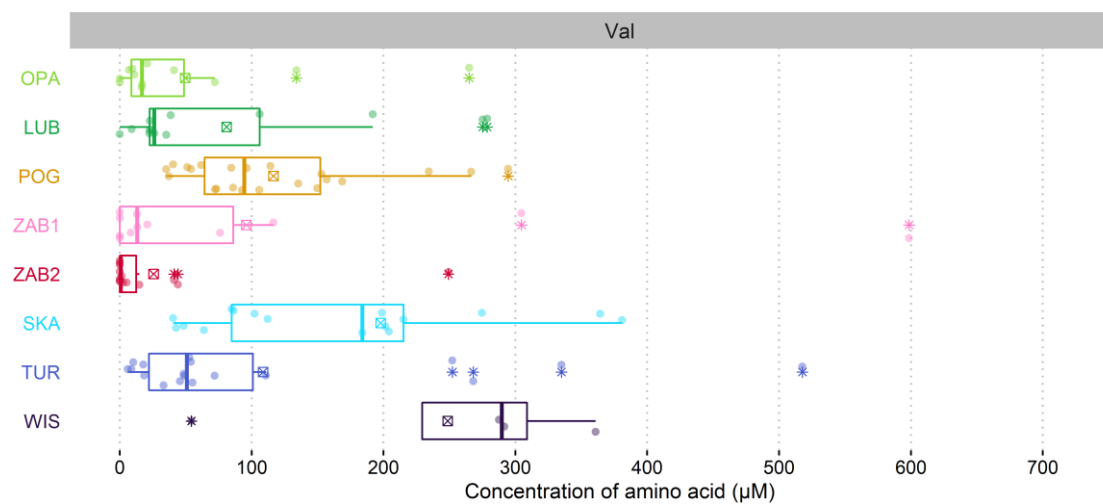

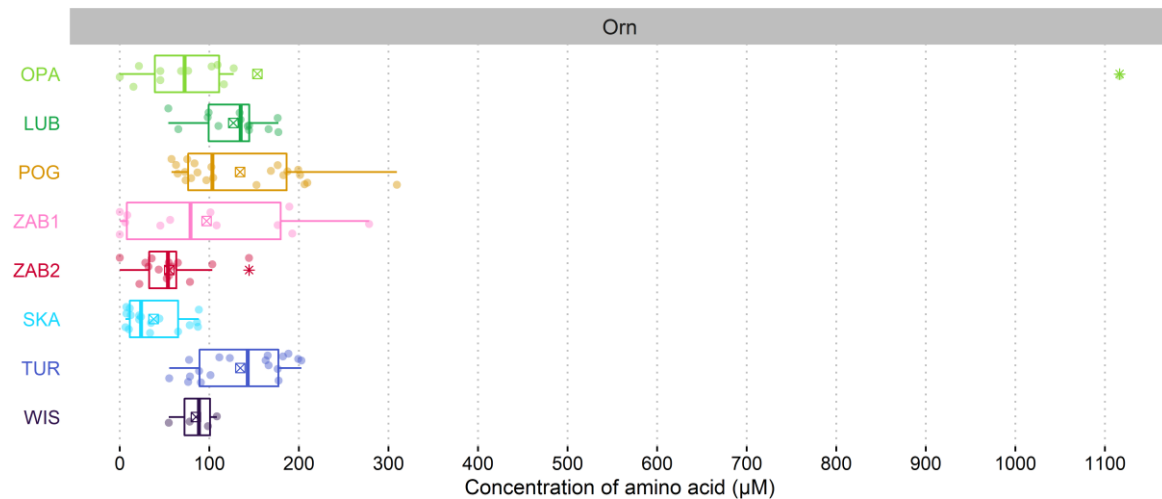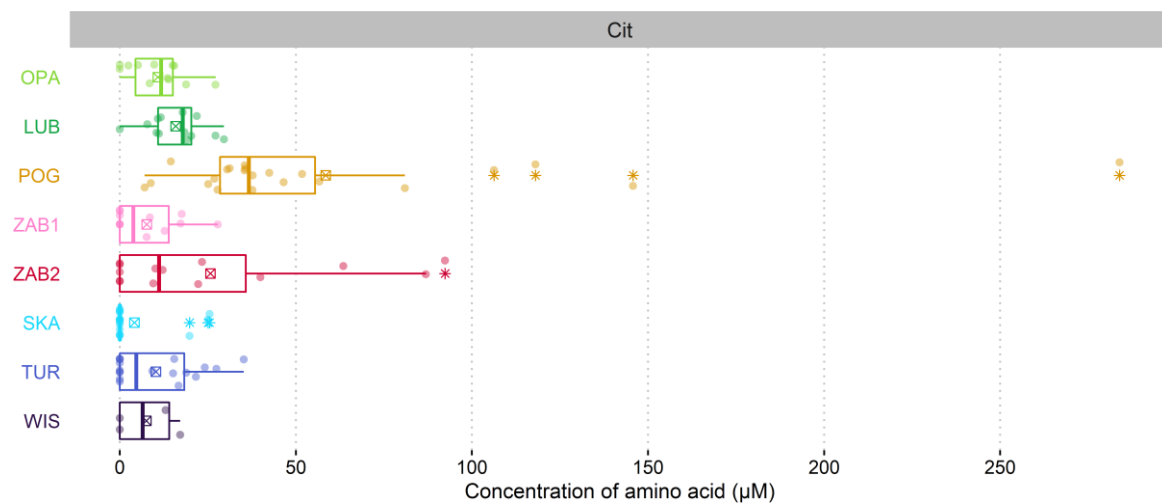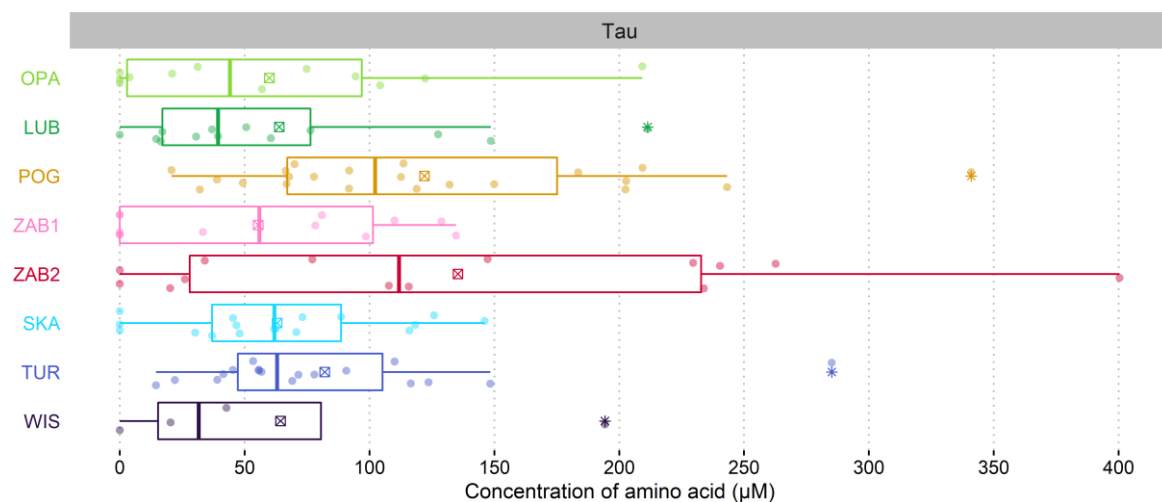

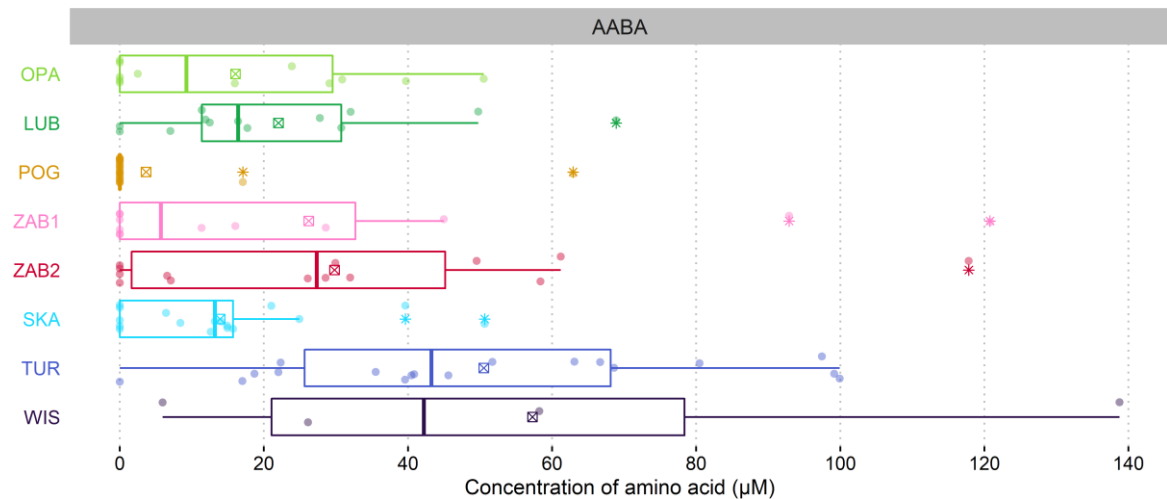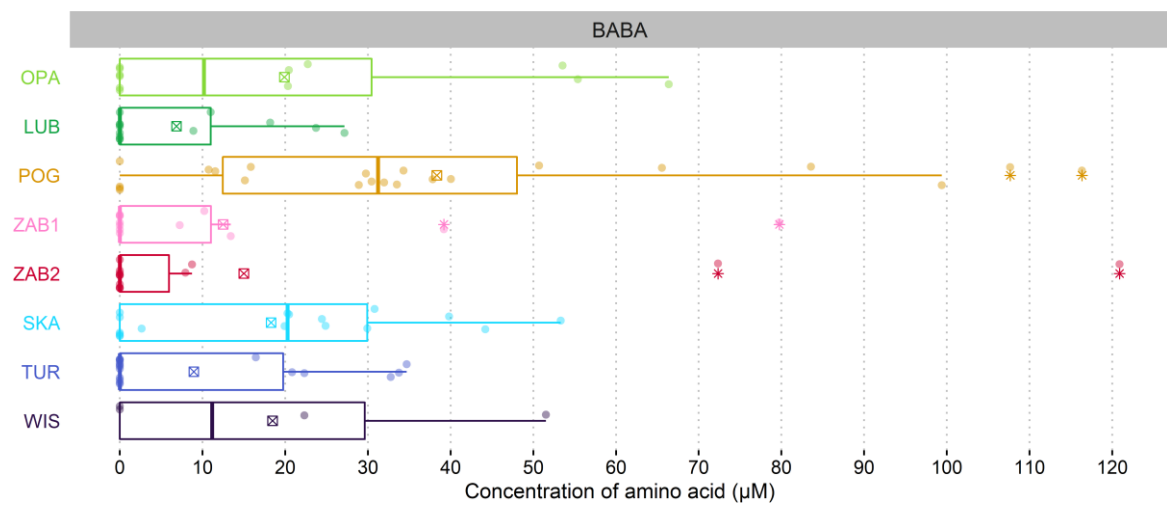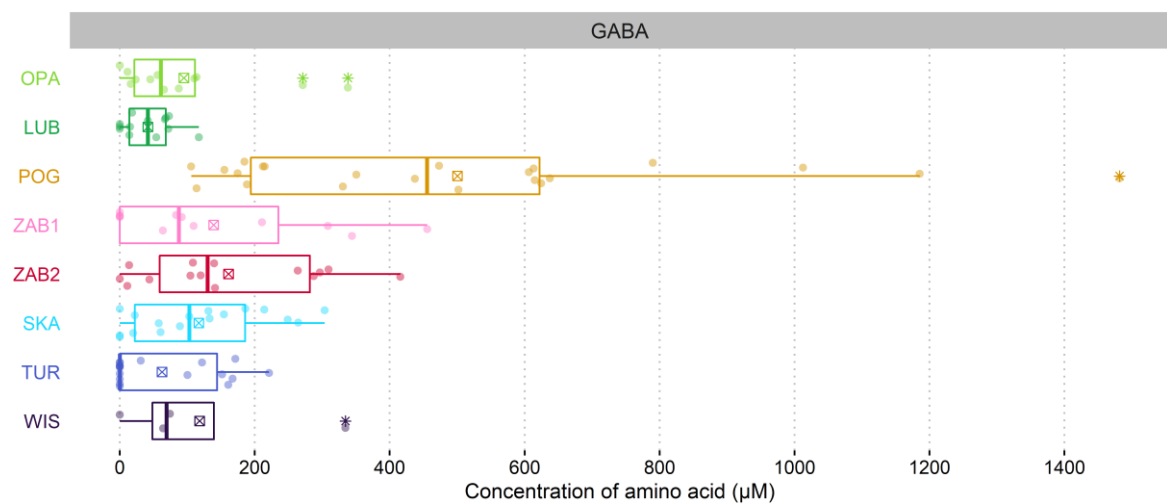

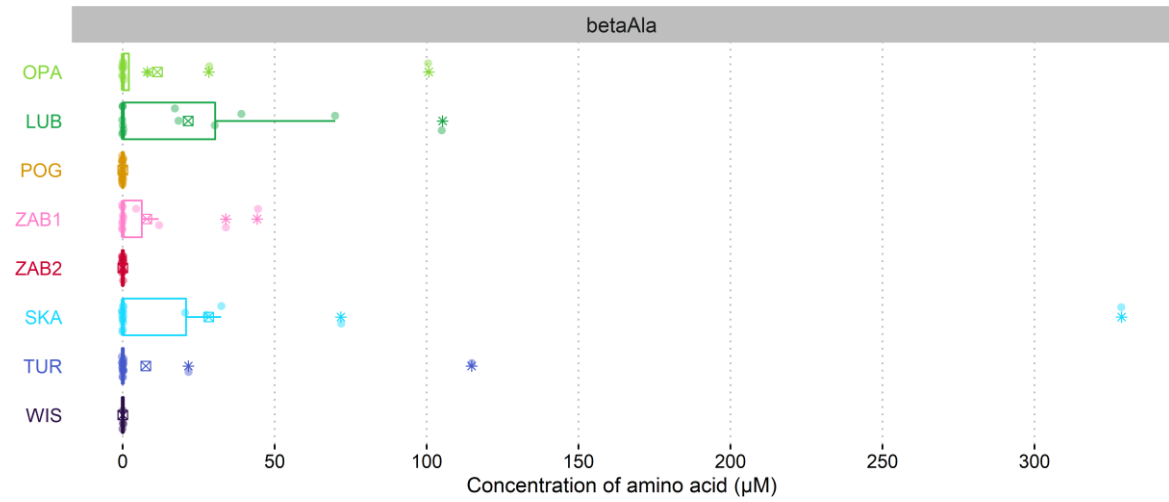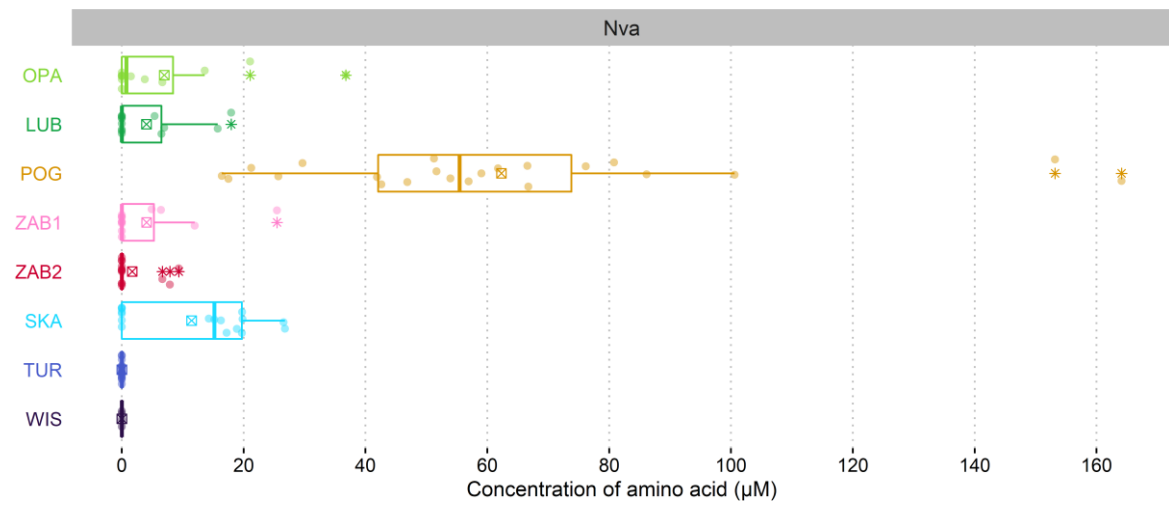

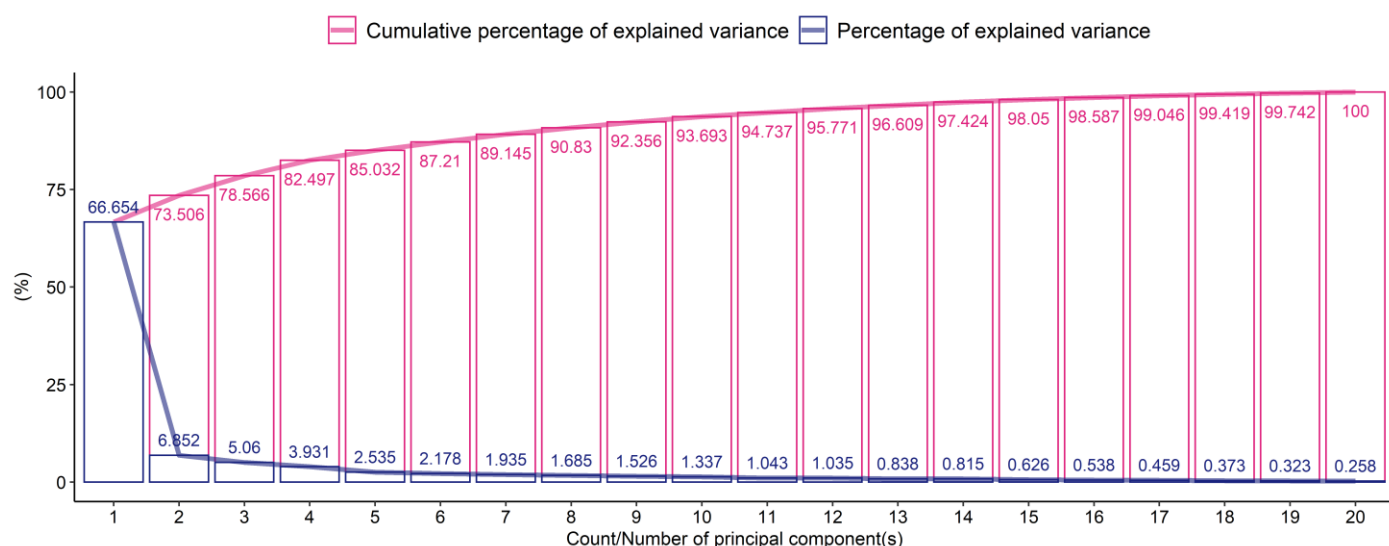

**Figure S2.** Scree plot showing the proportion of explained variance by the principal components.

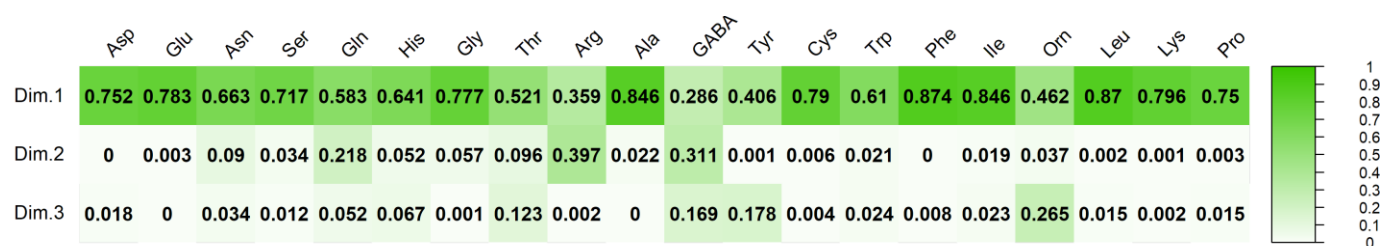

**Figure S3.**  $\text{Cos}^2$  for the amino acids selected as active variables in the principal component analysis model, representing the quality of representation for variables on the factor map (Dim1-3).

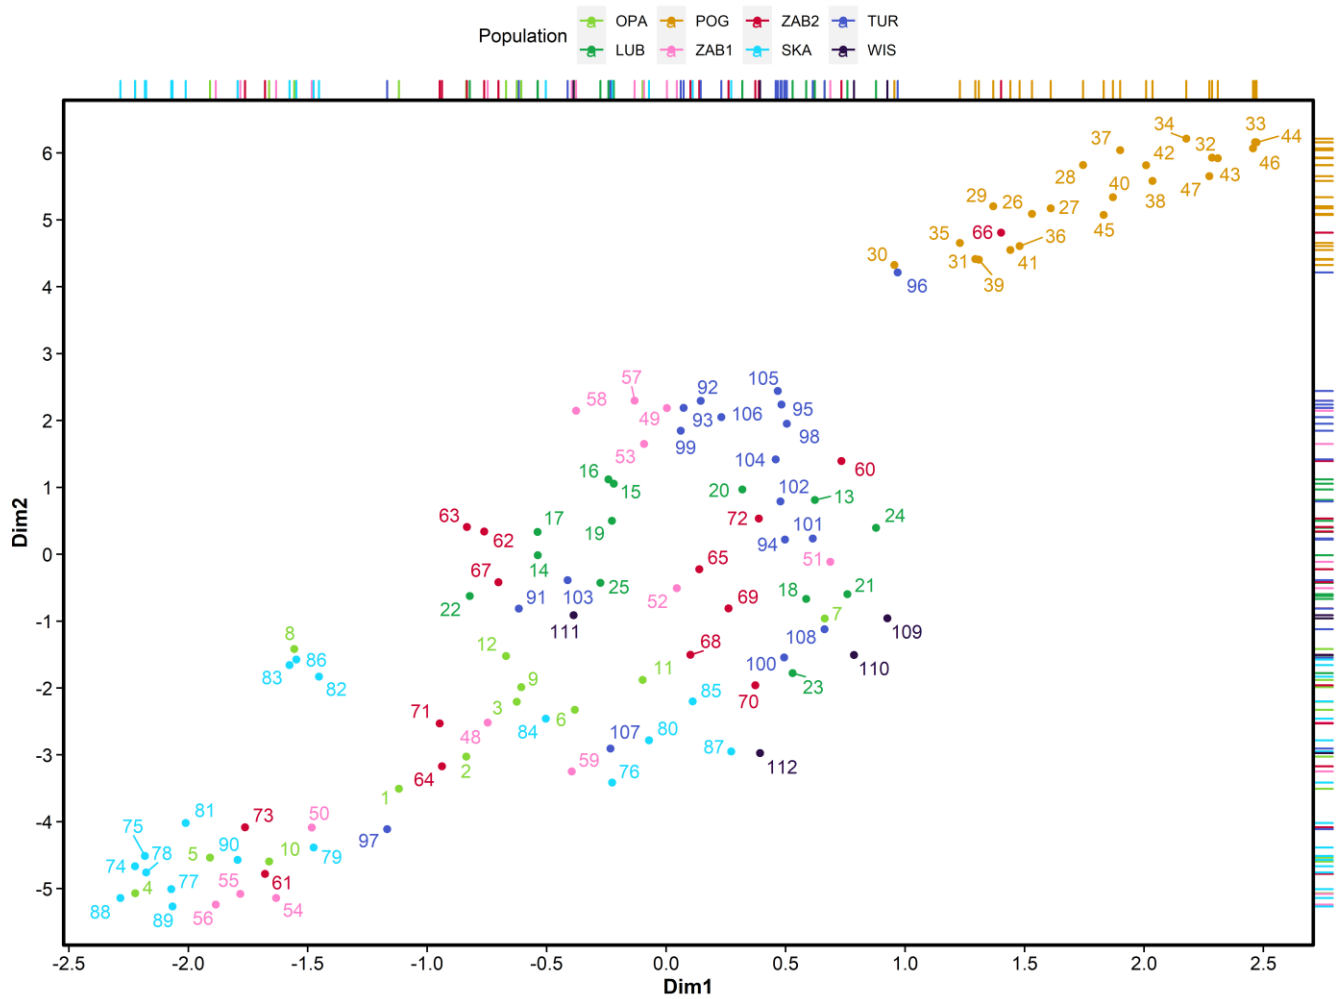

**Figure S4.** Uniform manifold approximation and projection of all amino acids in *Neottia ovata* populations, except for  $\beta$ -Ala. Individuals (populations) are color-coded and labeled with a number corresponding to Id used in Table S3.
